# Supplementary material for: Conditioning Factors of Linearized Wood’s Function Lactation Curve Shape Parameters, Milk Yield, Fat and Protein Content in Murciano-Granadina Primiparous Does
Source: PubMed Central journal article supplement (PMC7697502; doi:10.3390/ani10112115), 2020-11-15
Supplement: animals-10-02115-s001.pdf [file animals-10-02115-s001.pdf]

**Table S1:** *Number of lactations per farm.*

| <b>Farm</b> | <b>Frequency</b> | <b>Farm</b> | <b>Frequency</b> | <b>Farm</b> | <b>Frequency</b> | <b>Farm</b> | <b>Frequency</b> | <b>Farm</b> | <b>Frequency</b> | <b>Farm</b> | <b>Frequency</b> |
|-------------|------------------|-------------|------------------|-------------|------------------|-------------|------------------|-------------|------------------|-------------|------------------|
| AAB         | 183              | CP          | 88               | GFB         | 205              | GPA         | 270              | JAC         | 136              | OB          | 55               |
| AAD         | 3                | CR          | 7                | GFG         | 147              | GPC         | 303              | JB          | 33               | OMM         | 17               |
| AAG         | 180              | CRV         | 30               | GFJ         | 1                | GPF         | 23               | JBF         | 110              | PM          | 31               |
| AAO         | 42               | CSN         | 340              | GGE         | 217              | GPM         | 316              | JCS         | 190              | PMA         | 5                |
| AAR         | 12               | CYR         | 102              | GHA         | 201              | GPP         | 1                | JEG         | 32               | PPO         | 42               |
| AAT         | 31               | DAD         | 442              | GHG         | 8                | GPS         | 179              | JH          | 45               | PR          | 28               |
| ABC         | 175              | DMA         | 1                | GIL         | 192              | GPV         | 26               | JL          | 22               | RBB         | 281              |
| AC          | 166              | DP          | 93               | GIO         | 657              | GRA         | 3                | JLR         | 3                | RBG         | 84               |
| ACG         | 9                | EBM         | 412              | GIS         | 116              | GRE         | 392              | JRE         | 103              | RCH         | 6                |
| ACM         | 99               | ECG         | 2                | GJC         | 91               | GRF         | 9                | JRT         | 4                | RK          | 93               |
| ADH         | 7                | FCR         | 38               | GJI         | 63               | GRJ         | 234              | JSG         | 19               | RLM         | 16               |
| AFH         | 41               | FD          | 4                | GJL         | 82               | GRR         | 425              | JUN         | 72               | RO          | 13               |
| AG          | 488              | FH          | 1                | GJN         | 252              | GRS         | 2                | KAH         | 36               | RRL         | 751              |
| AGG         | 55               | FM          | 36               | GJP         | 476              | GSJ         | 87               | KAJ         | 2                | RSR         | 11               |
| AGH         | 3                | FMM         | 135              | GJR         | 112              | GTJ         | 58               | KAN         | 15               | SAR         | 56               |
| AJ          | 55               | FRA         | 297              | GLG         | 86               | GTN         | 258              | KAV         | 733              | SB          | 69               |
| AJG         | 559              | FYA         | 43               | GLH         | 194              | GUI         | 10               | KH          | 25               | VJP         | 53               |
| ALH         | 91               | GAE         | 63               | GLJ         | 202              | GXG         | 25               | KY          | 178              | WAD         | 378              |
| AM          | 50               | GAM         | 56               | GLM         | 49               | GYR         | 67               | KYB         | 25               | WAG         | 75               |
| AMC         | 233              | GAP         | 303              | GLP         | 34               | HC          | 14               | KZ          | 7                | WAJ         | 16               |
| AUG         | 161              | GBA         | 39               | GLS         | 133              | HN          | 153              | LPP         | 522              | WAM         | 34               |
| AV          | 246              | GBB         | 93               | GLV         | 9                | HP          | 10               | LR          | 18               | WD          | 131              |
| AVE         | 106              | GBM         | 176              | GME         | 317              | HR          | 17               | LRP         | 185              | WJ          | 55               |
| AVR         | 8                | GCB         | 38               | GMF         | 35               | HZC         | 28               | LW          | 108              | XY          | 12               |
| BAB         | 98               | GCG         | 84               | GMG         | 630              | IAD         | 260              | MG          | 203              | YK          | 52               |
| BJJ         | 62               | GCM         | 185              | GMH         | 225              | ICN         | 3                | MGE         | 129              | YM          | 24               |
| BS          | 4                | GDD         | 77               | GMJ         | 79               | IE          | 19               | MI          | 231              | YO          | 32               |
| CF          | 13               | GDL         | 217              | GND         | 132              | IF          | 2                | MLA         | 65               | ZAF         | 99               |
| CIK         | 9                | GDP         | 39               | GOM         | 347              | IK          | 230              | MMA         | 155              | ZS          | 36               |
| CL          | 342              | GDS         | 350              | GOP         | 100              | IQ          | 264              | MO          | 23               |             |                  |
| CLH         | 33               | GEA         | 142              | GOT         | 189              | IR          | 51               | MT          | 96               |             |                  |
